# Supplementary material for: Seeded growth of gold–silver ultrathin wire–dot hybrid nanostructures
Source: Royal Society of Chemistry journal article supplement (doi:10.1039/d0ce01009j), 2020-01-01
Supplement: d0ce01009j1.pdf [file d0ce01009j1.pdf]

Supporting Information for

## **Seeded Growth of Gold-Silver Ultrathin Wire-dot Hybrid Nanostructures**

Gongguo Zhang,<sup>a</sup> Yanyun Ma,<sup>b</sup> Feng Liu,<sup>c</sup> Yuting Nie,<sup>b</sup> Zhiang Liu,<sup>c</sup> Xiaowei Fu,<sup>a</sup> Xiaoqian Luan,<sup>d</sup> Fengli Qu,<sup>d</sup> Maochang Liu,<sup>c</sup> and Yiqun Zheng<sup>\*a</sup>

<sup>a</sup> *Department of Chemistry and Chemical Engineering, Jining University, Qufu, Shandong 273115, P. R. China.*

<sup>b</sup> *Institute of Functional Nano & Soft Materials (FUNSOM), Jiangsu Key Laboratory for Carbon-Based Functional Materials & Devices, Soochow University, Suzhou, Jiangsu 215123, P. R. China.*

<sup>c</sup> *International Research Center for Renewable Energy, National Key Laboratory of Multiphase Flow in Power Engineering, Xi'an Jiaotong University, Xi'an, Shanxi 710049, China*

<sup>d</sup> *School of Chemistry and Chemical Engineering, Qufu Normal University, Qufu, Shandong, China*

<sup>\*</sup>*Corresponding Author: Prof. Y. Zheng, E-mail: whzyq@163.com*

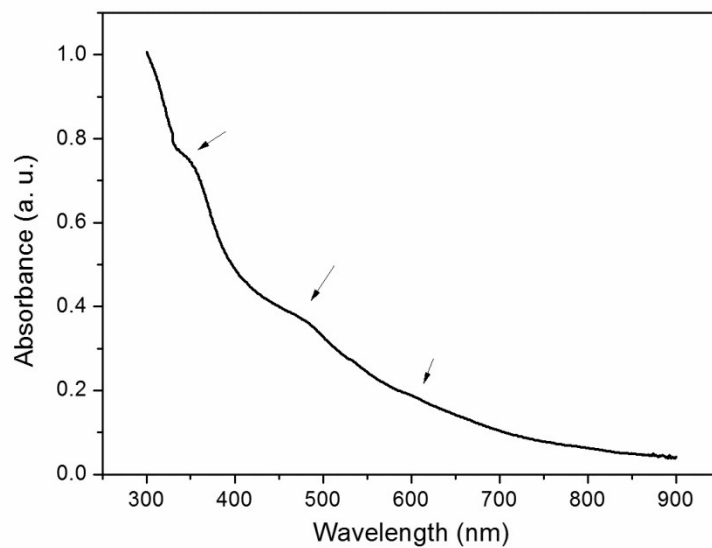

**Figure S1.** UV-vis extinction spectrum of CTAB-Au seeds aqueous suspension. The arrows indicate the presence of characterized shoulder peaks.

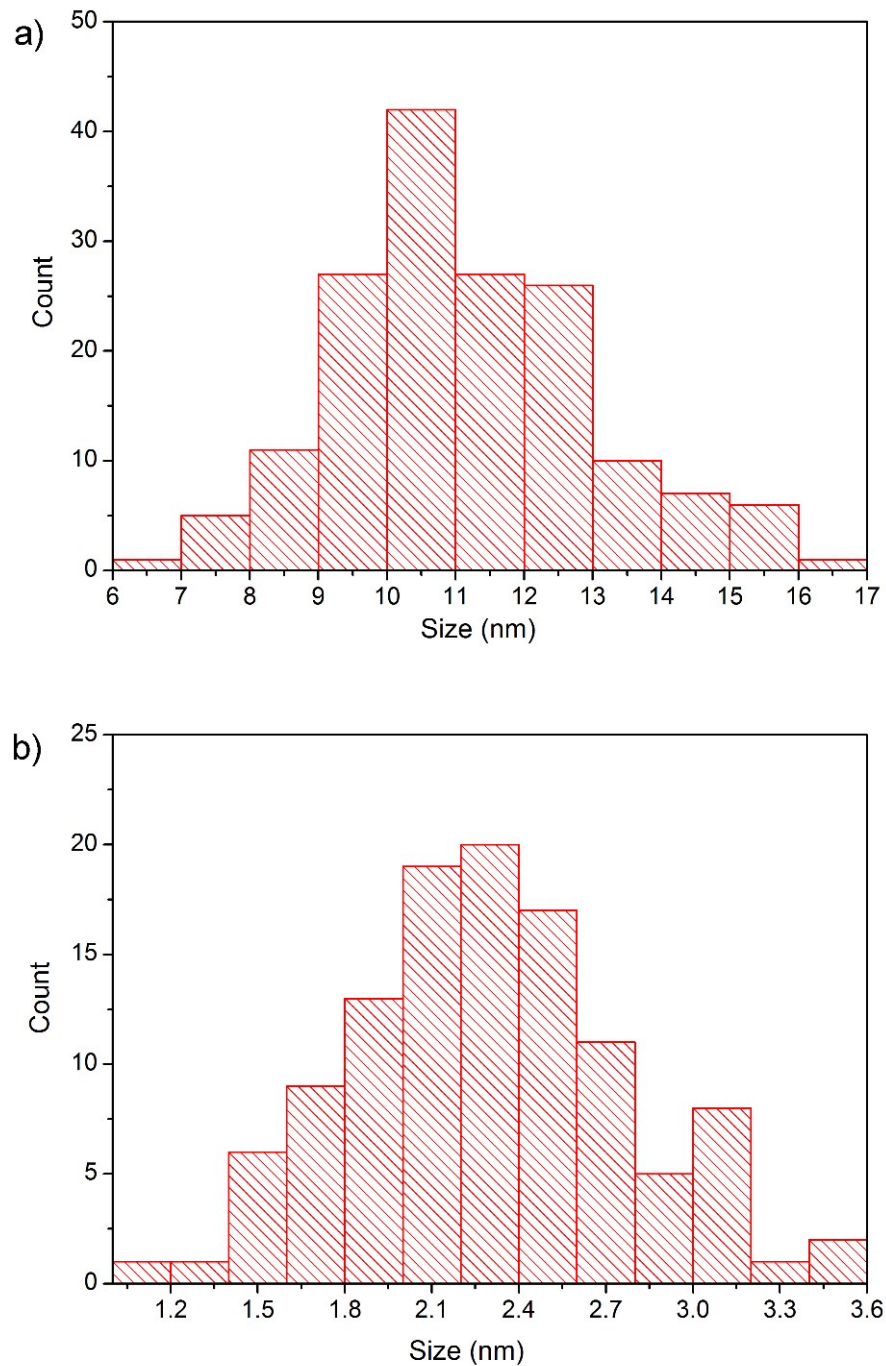

**Figure S2.** Histograms showing the size distribution for both a) dot and b) wire regions in Au-Ag ultrathin wire-dot nanostructures. They were statistically measured by counting 100 typical regions in corresponding TEM images.

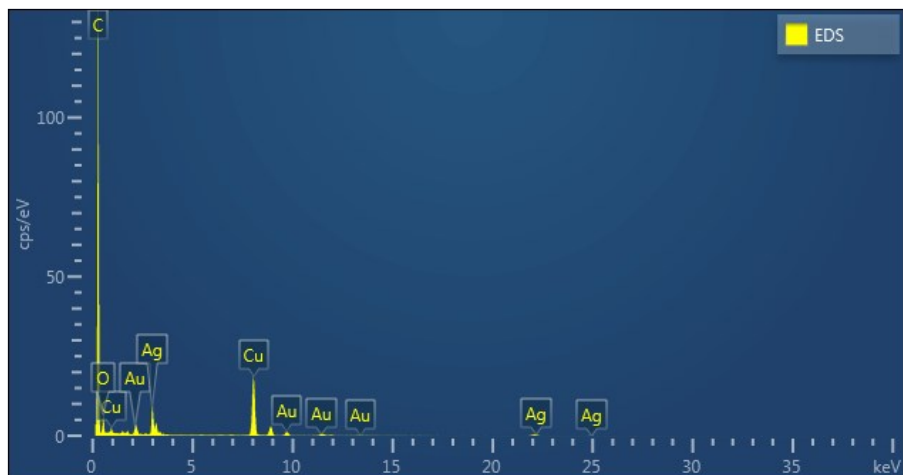

**Figure S3.** EDX spectrum of Au-Ag ultrathin wire-dot nanostructures. The molar ratio of Ag to Au was measured to be 3:1.

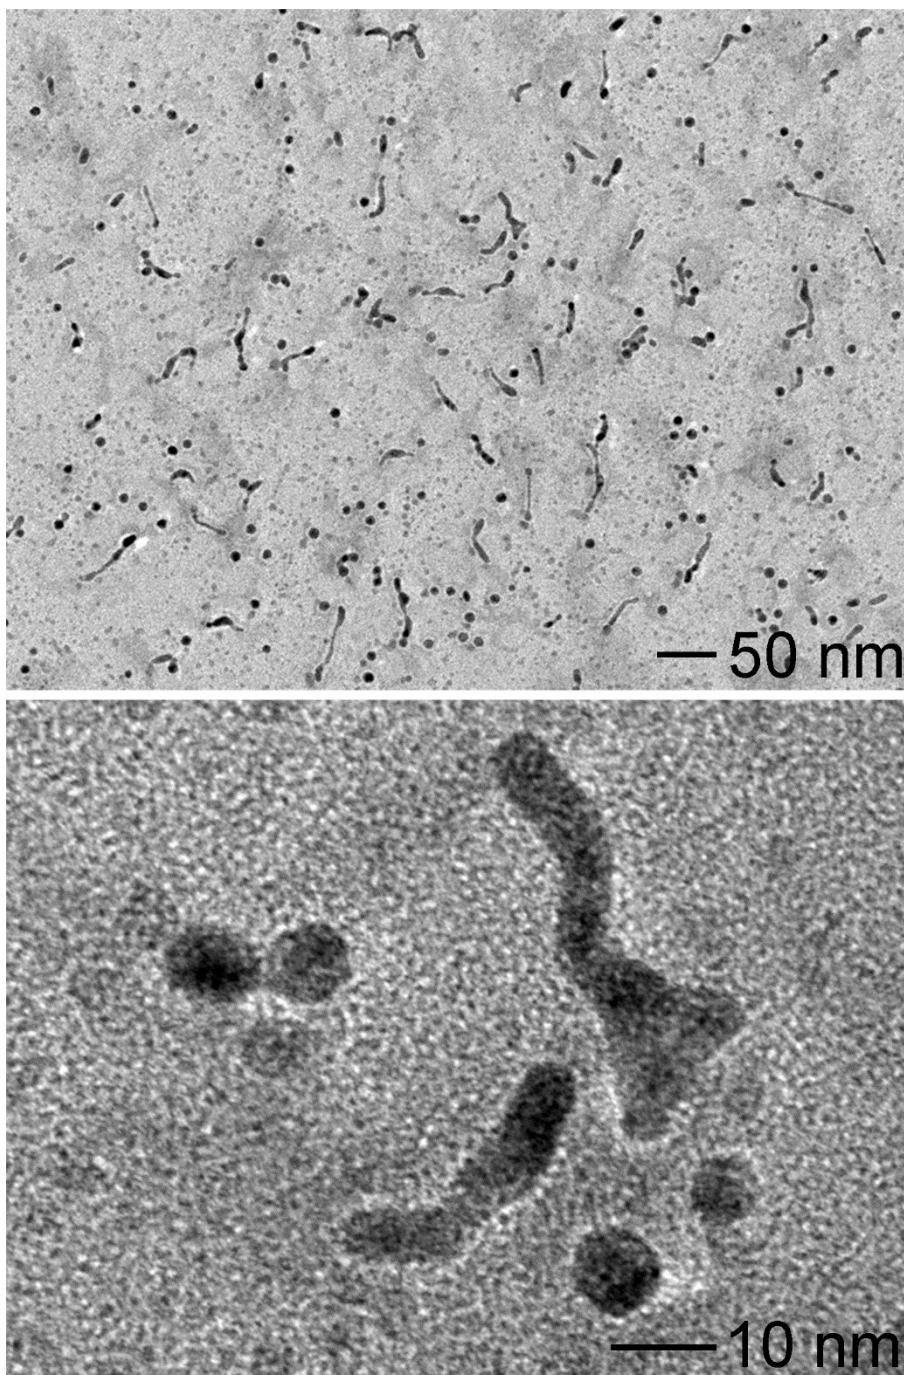

**Figure S4.** TEM image of products obtained by reacting one-batch of Au-Ag ultrathin wire-dot nanostructures with 0.5  $\mu\text{mol}$  of  $\text{HAuCl}_4$ .

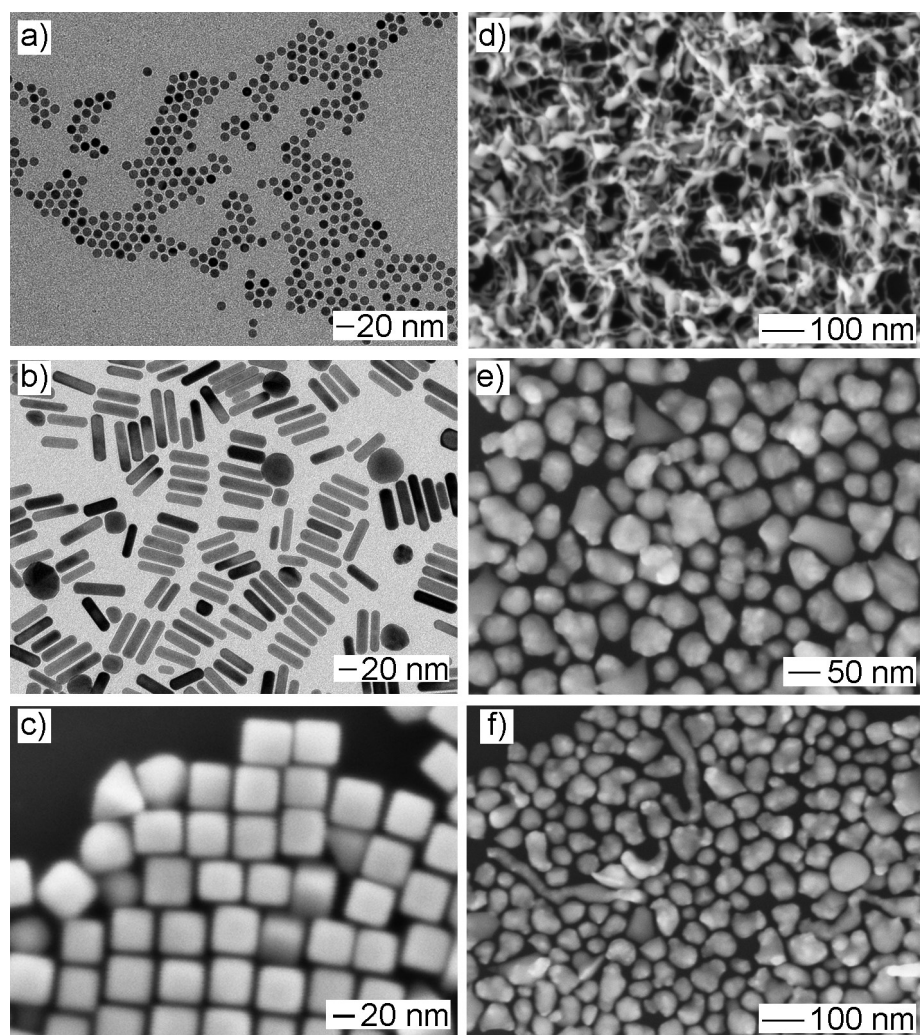

**Figure S5.** Effect of seed size/morphology on product morphology. a, b) TEM and c) SEM images of seeds in the form of a) Au nanospheres (10 nm in diameter); b) Au nanorods ( $\Phi 12 \cdot L 47$  nm); c) Au@Ag nanocubes (44 nm in edge length), respectively. d-f) SEM images of products obtained via the standard procedure, except that the Au seeds were replaced by corresponding seeds as displayed in a-c), respectively.

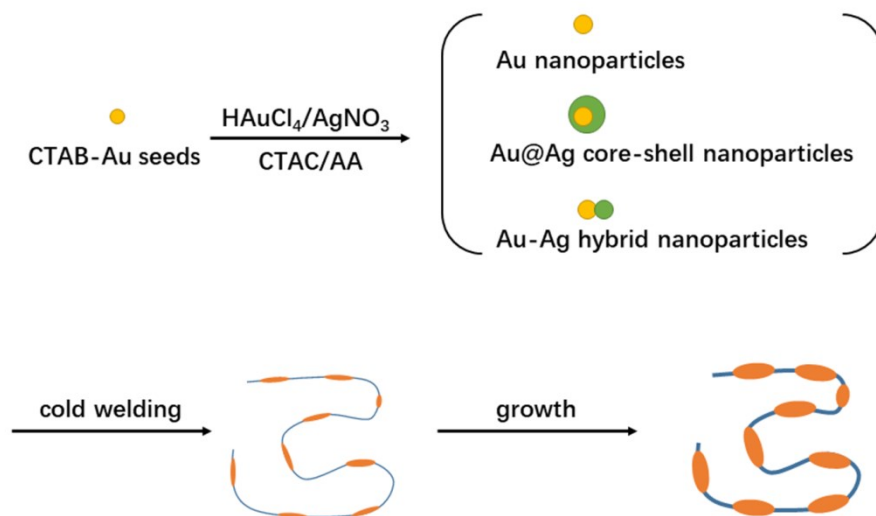

**Figure S6.** Schematic illustration showing the formation mechanism of Au-Ag ultrathin wire-dot hybrid nanostructure.

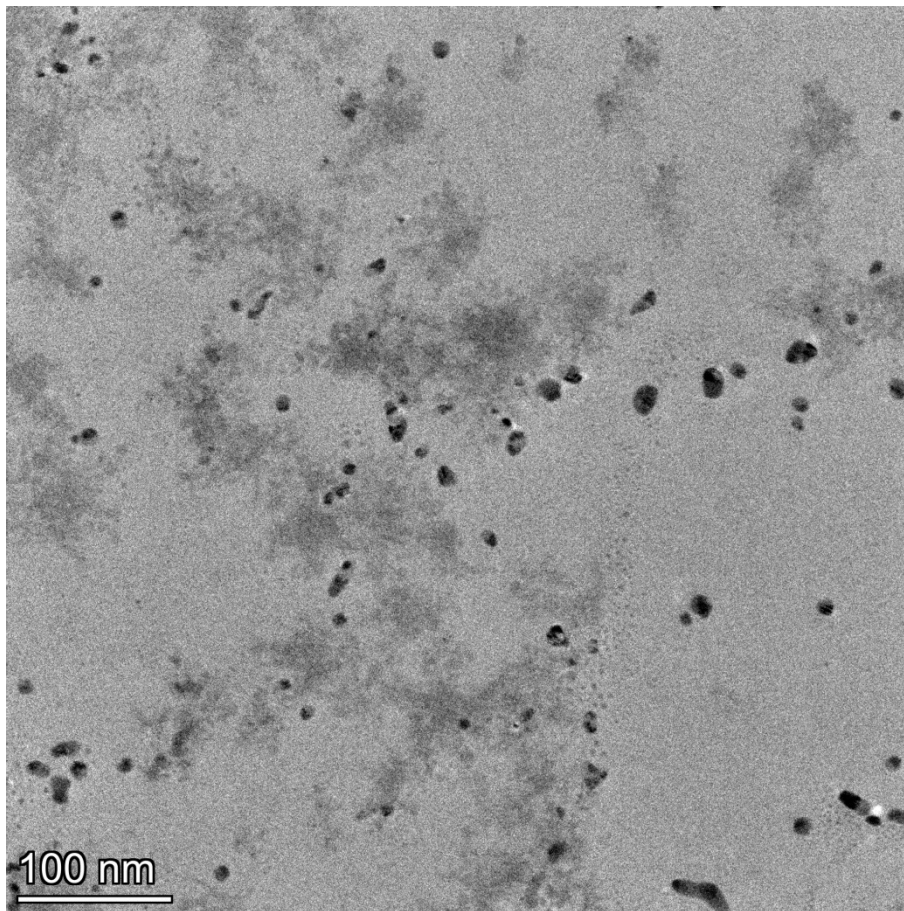

**Figure S7.** Effect of CTAC on product morphology. TEM image of product obtained via the standard procedure, except that the CTAC amount was varied from 400  $\mu\text{mol}$  in standard procedure to 40  $\mu\text{mol}$ .



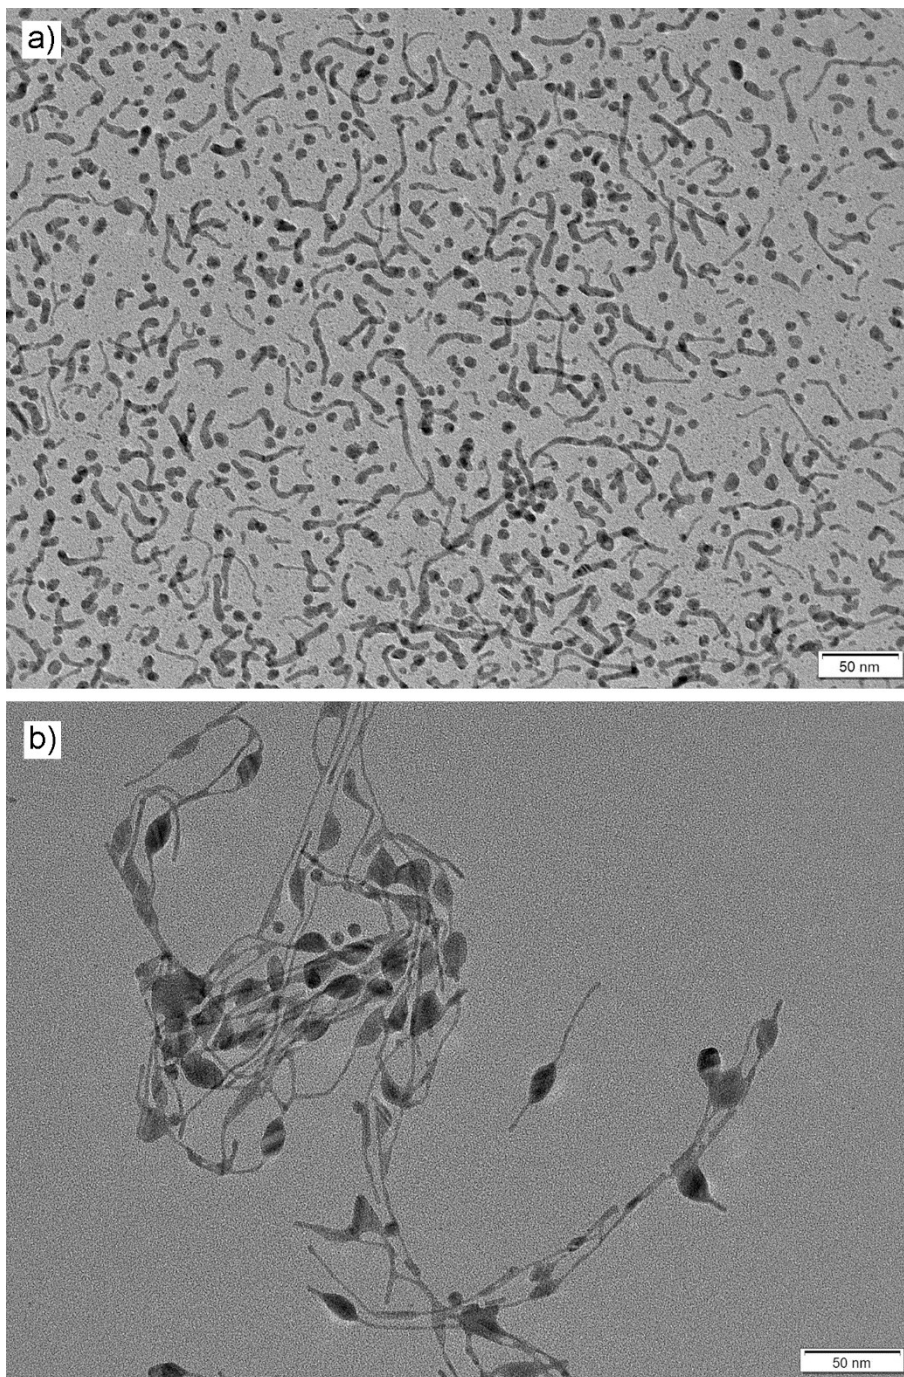

**Figure S8.** Effect of AA amount on product morphology. TEM images of products obtained via the standard procedure, except that the amount of AA was varied from 150  $\mu\text{mol}$  in standard procedure to a) 100 and b) 300  $\mu\text{mol}$ , respectively.

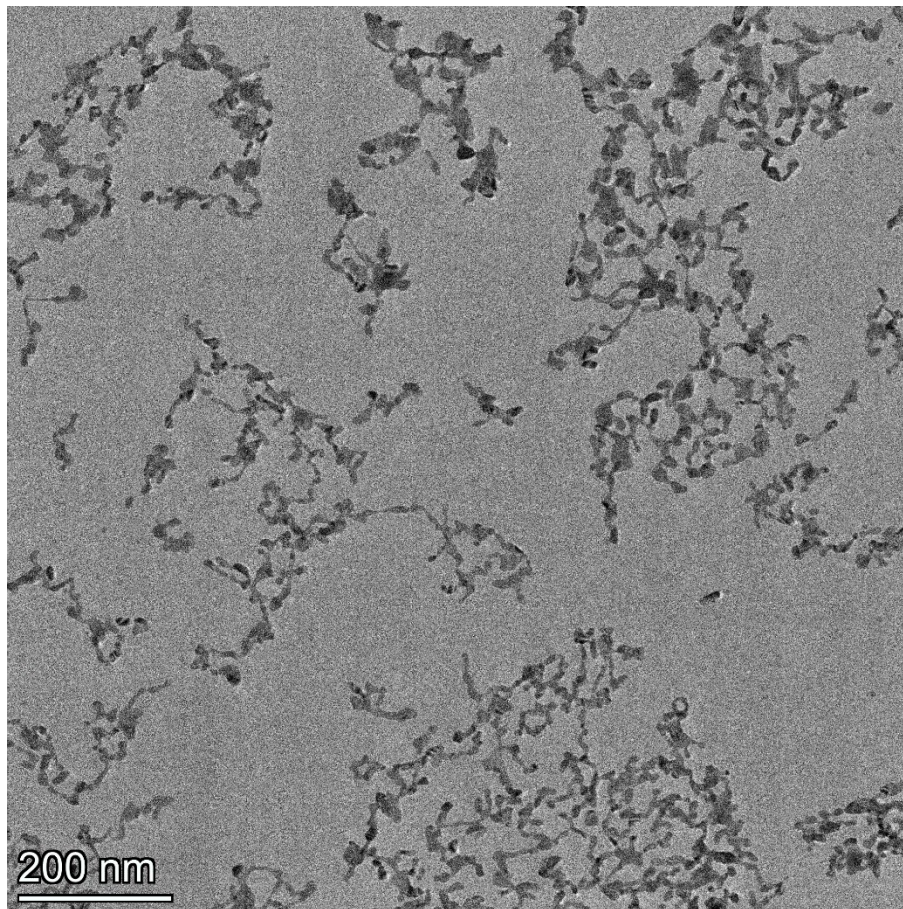

**Figure S9.** TEM image of sample as illustrated in Figure 1 after being aged on copper grid for one month.
